# Supplementary material for: Fermented Oyster Extract Promotes Osteoblast Differentiation by Activating the Wnt/β-Catenin Signaling Pathway, Leading to Bone Formation
Source: PubMed Central journal article supplement (PMC6920898; doi:10.3390/biom9110711), 2019-11-06
Supplement: biomolecules-09-00711-s001.pdf [file biomolecules-09-00711-s001.pdf]

**Table S1.** Proximate composition of FO

| FO           | (%)        |
|--------------|------------|
| Protein      | 60.0 ± 0.7 |
| Carbohydrate | 36.0 ± 0.7 |
| Lipid        | 3.3 ± 0.1  |
| Ash          | 0.7 ± 0.1  |

**Table S2.** Amino acid content in FO

| Amino acids   | Concentration (%) |
|---------------|-------------------|
| Aspartic acid | 5.3               |
| Glutamic acid | 6.7               |
| Serine        | 0.9               |
| Histidine     | 0.9               |
| Glycine       | 2.9               |
| Threonine     | 2.6               |
| Arginine      | 1.9               |
| Alanine       | 5.0               |
| Taurine       | 3.0               |
| Tyrosine      | 1.7               |
| Valine        | 3.0               |
| Methionine    | 1.0               |
| Phenylalanine | 2.0               |
| Isoleucine    | 2.6               |
| Leucine       | 3.7               |
| Lysine        | 29.2              |
| Proline       | 3.1               |
| GABA*         | 24.5              |
| Total         | 100               |

\* GABA; Gamma aminobutyric acid

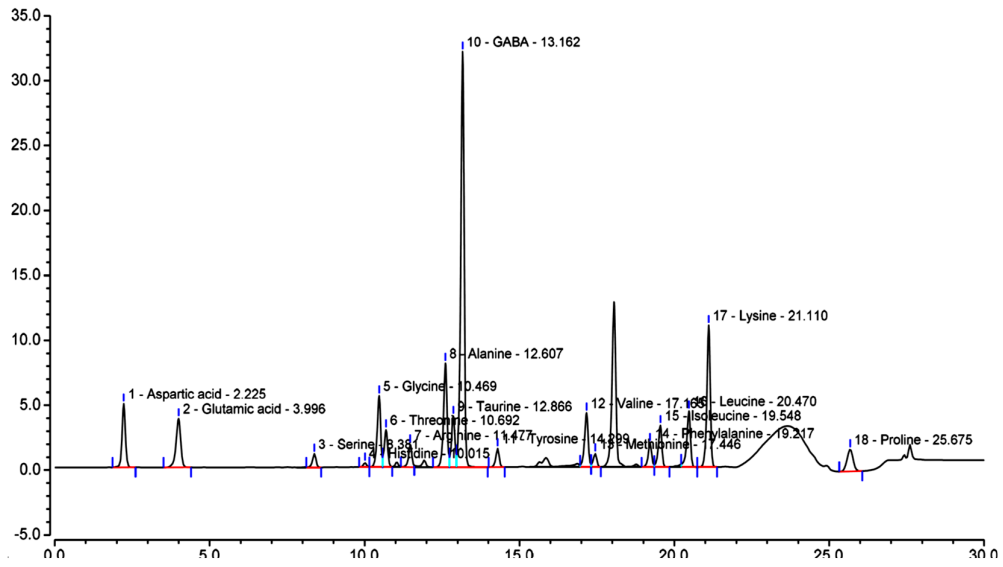

**Figure S1.** UPLC chromatogram for amino acids of FO.
